# Supplementary material for: The wildland fire emission inventory: western United States emission estimates and an evaluation of uncertainty
Source: Copernicus journal article supplement (doi:10.5194/acp-11-12973-2011), 2011-12-20
Supplement: Supplementary file 1 [file Urbanski_WFEI_Supplement_captions_Upload.doc]

Figure S1. Determination of figure of merit, ũECO, for Δx = 25 km and Δt = 30 day.

Figure S2. Determination of ũECO sensitivity to uFLC for Δx = 200 km and Δt = 30 day.
